# Supplementary material
Source: Springer Nature journal article supplement (https://www.springermedizin.de/resource/supplementary/12936_2009_1131_MOESM1_ESM.pdf/9549944)

Manufacturer

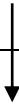

Primary  
supplier

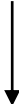

Intermediate 1  
supplier

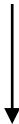

Intermediate 2  
supplier

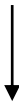

Terminal  
supplier

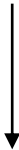

Retail supplier

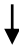

Consumer

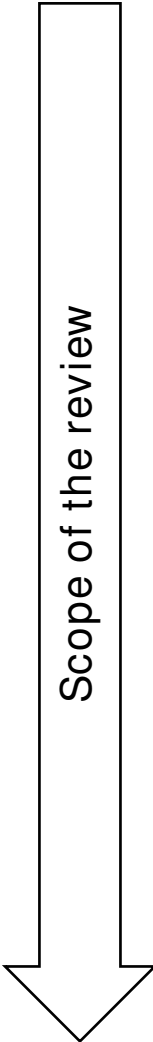

Supplement: MOESM1 [file 9549944]
